# Supplementary material for: Biological Activity and NMR-Fingerprinting of Balkan Endemic Species Stachys thracica Davidov
Source: MDPI journal article supplement (doi:10.3390/metabo12030251), 2022-03-16
Supplement: s1 [file s1]

## Supplementary Table S1

**Table S1.** Summary of SRAP alleles data following SRAP analysis of *S. thracica*.

| Primer Pair | SRAP Alleles<br>for <i>S. thracica</i> <sup>a</sup> |
|-------------|-----------------------------------------------------|
| ME1_EM3     | 56                                                  |
| ME1_EM5     | 28                                                  |
| ME1_EM6     | 23                                                  |
| ME1_EM7     | 33                                                  |
| ME1_EM10    | 27                                                  |
| ME3_EM2     | 38                                                  |
| ME3_EM5     | 28                                                  |
| ME4_EM5     | 33                                                  |
| ME6_EM3     | 36                                                  |
| ME6_EM5     | 28                                                  |
| ME7_EM2     | 29                                                  |
| ME8_EM1     | 36                                                  |
| ME8_EM8     | 34                                                  |
| ME10_EM4    | 29                                                  |
| ME10_EM7    | 27                                                  |
| ME10_EM9    | 11                                                  |
| Total       | 496                                                 |
